# Supplementary material for: Controlling vertical alignment of phthalocyanine nanofibers on transparent graphene-coated ITO electrodes for organic field emitters
Source: Royal Society of Chemistry journal article supplement (doi:10.1039/c2jm30383c), 2012-01-01
Supplement: c2jm30383c.pdf [file c2jm30383c.pdf]

## Electronic Supplementary Information (ESI)

### Controlling Vertical Alignment of Phthalocyanine Nanofibers on Transparent Graphene-Coated ITO Electrodes for Organic Field Emitters

**Kuo-Jung Huang<sup>a</sup>, Yu-Sheng Hsiao<sup>\*b</sup> Jen-Hsien Huang,<sup>b</sup> Chih-Wei Chu,<sup>b</sup> Peilin  
Chen,<sup>b</sup> and Wha-Tzong Whang<sup>\*a</sup>**

<sup>a</sup>Department of Materials Science and Engineering, National Chiao Tung University,  
Hsinchu 30010, Taiwan, ROC. Tel.: +886-35-731873; fax: +886-35-724727; e-mail:  
[wthang@mail.nctu.edu.tw](mailto:wthang@mail.nctu.edu.tw)

<sup>b</sup>Research Center for Applied Sciences, Academia Sinica, Taipei 11529, Taiwan, ROC.  
Tel.: +886-2-27898000-21; fax: +886-2-27826680; e-mail: [yshsiao@gate.sinica.edu.tw](mailto:yshsiao@gate.sinica.edu.tw)

## Supporting Experimental Results

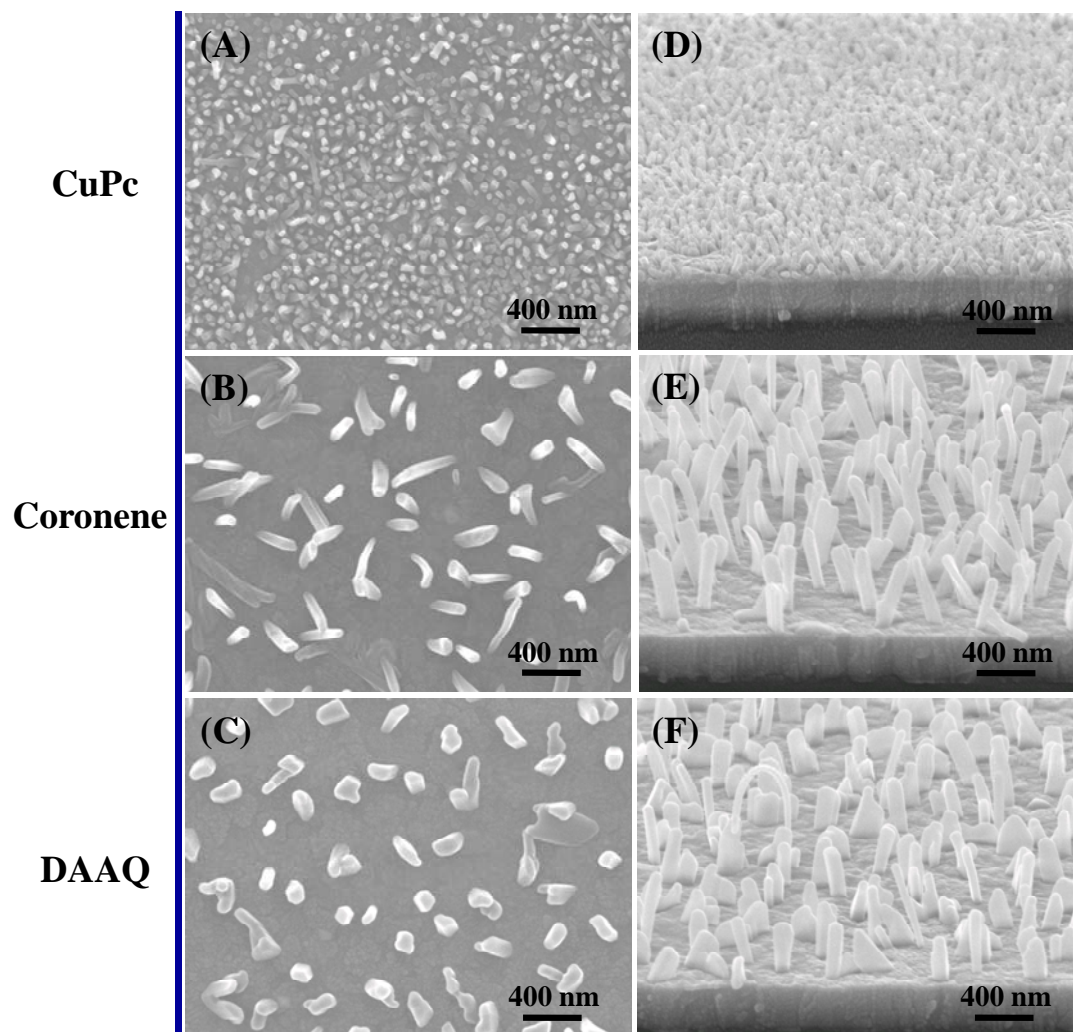

**Fig. S1** (A–C) Top-view and (D–F) cross-sectional SEM images of (A, D) CuPc, (B, E) coronene and (C, F) DAAQ deposited on rGO/ITO substrates.
